# Supplementary material for: Archaeal TFEα/β is a hybrid of TFIIE and the RNA polymerase III subcomplex hRPC62/39
Source: PubMed Central journal article supplement (PMC4495717; doi:10.7554/elife.08378), 2015-06-12
Supplement: elife08378s003.pdf [file elife08378s003.pdf]

**Supplementary file 1 – List of plasmids generated by restriction enzyme-based cloning**

| Plasmid ID | Backbone                            | Insert(s)                                                                                   | Restriction sites                  | Oligonucleotide pairs used for amplification |
|------------|-------------------------------------|---------------------------------------------------------------------------------------------|------------------------------------|----------------------------------------------|
| p988       | pET21a+ (Merck Millipore)           | Sso TFE $\alpha$                                                                            | NdeI/EcoRI                         | FW239/FW240                                  |
| p1051      | pSVA1481 (S.V. Albers, unpublished) | Sso TFE $\beta$ C-His <sub>10</sub>                                                         | BamHI/NcoI                         | FW280/FW281                                  |
| p1056      | pMJ0503 (Jonuscheit et al., 2003)   | Sso TFE $\beta$ C-His <sub>10</sub>                                                         | AvrII/EagI                         | subcloning from p1051                        |
| p1058      | pSVA406 (Wagner et al., 2012)       | Overlap extension PCR product fusing the upstream and downstream flanks of <i>Sacj_1342</i> | NcoI/BamHI                         | FW282/FW283 and FW284/FW285                  |
| p1071      | pET21a+ (Merck Millipore)           | Sso TFE $\alpha$ $\Delta$ 111-178                                                           | NdeI/EcoRI                         | FW239/FW333                                  |
| p1076      | pET21a+ (Merck Millipore)           | Sso TFE $\alpha$ and Sso <i>tfe</i> $\beta$ C-His <sub>6</sub>                              | NdeI/EcoRI/XhoI                    | FW239/FW240 and FW242/FW279                  |
| p1077      | pRSF-1b (Merck Millipore)           | Sso TFE $\beta$ C-His <sub>6</sub>                                                          | NcoI/AvrII                         | FW280/FW336 (amplified from p1050)           |
| p1087      | pET21a+ (Merck Millipore)           | Sso TFB (Sso0446) C-His <sub>6</sub>                                                        | NdeI/XhoI                          | FW337/FW338                                  |
| p1092      | pRSF-1b (Merck Millipore)/p1077     | Sso TFE $\beta$ C-His <sub>6</sub> $\Delta$ 74-125                                          | NdeI/XhoI                          | FW280/FW347                                  |
| p1094      | pRSF-1b (Merck Millipore)/p1077     | Sso TFE $\beta$ C-His <sub>6</sub> $\Delta$ 85-125                                          | NdeI/XhoI                          | FW280/FW349                                  |
| p1107      | pET21a+ (Merck Millipore)           | Sso TFE $\alpha$ $\Delta$ 1-110                                                             | NdeI/EcoRI                         | FW387/FW240                                  |
| p1108      | pET21a+ (Merck Millipore)           | Sso TFE $\alpha$ $\Delta$ 148-178                                                           | NdeI/EcoRI                         | FW239/FW388                                  |
| p1110      | pRSF-1b (Merck Millipore)/p1077     | Sso TFE $\beta$ C-His <sub>6</sub> $\Delta$ 1-73                                            | NcoI+ BspHI (compatible ends)/XhoI | FW396/FW279                                  |
| p1111      | pRSF-1b (Merck Millipore)           | Sso TFE $\beta$ C-His <sub>6</sub> $\Delta$ 1-84                                            | NcoI+ BspHI                        | FW397/FW279                                  |

|         |                                   |                                                                                                                                                                                       |                                    |                                                              |
|---------|-----------------------------------|---------------------------------------------------------------------------------------------------------------------------------------------------------------------------------------|------------------------------------|--------------------------------------------------------------|
|         | Millipore)/p1077                  |                                                                                                                                                                                       | (compatible ends)/XhoI             |                                                              |
| p1112   | pSVA406 (Wagner et al., 2012)     | Overlap extension PCR product fusing the upstream and downstream flanks of <i>SacI_1162</i> to the <i>SacI_1342</i> including 100 nt upstream of its predicted translation start site | PstI/BamHI                         | FW326/FW327, FW328/FW329 and FW330/FW331                     |
| p1121   | pET21a+ (Merck Millipore)         | Sso TBP                                                                                                                                                                               | NdeI/XhoI                          | FW449/340                                                    |
| p1159   | pET21a+ (Merck Millipore)         | N-His <sub>6</sub> hRPC62 and hRPC39                                                                                                                                                  | NdeI/EcoRI/XhoI                    | FW569/FW570 and FW566/FW567                                  |
| p1172   | pRSF-1b (Merck Millipore)/p1077   | recombinant RNAP clamp fusion of Rpo2 1055-1117, Rpo1' 4-315, and Rpo1" 340-377 C-His <sub>6</sub>                                                                                    | NcoI+ BspHI (compatible ends)/XhoI | FW673/FW436/FW437 /FW438/FW439/FW440 (Overlap extension PCR) |
| pSVA143 | pMZ1 (Zolghadr et al., 2007)      | Sso Rpo8 C-His <sub>10</sub> (Sso0277)                                                                                                                                                | NcoI/BamHI                         | 509/510                                                      |
| pSVA158 | pMJ0503 (Jonuscheit et al., 2003) | Sso Rpo8 C-His <sub>10</sub> (Sso0277)                                                                                                                                                | BglI/EagI                          | subcloning from pSVA143                                      |

#### Additional reference:

Zolghadr, B., S. Weber, Z. Szabo, A. J. Driessen and S. V. Albers (2007). "Identification of a system required for the functional surface localization of sugar binding proteins with class III signal peptides in *Sulfolobus solfataricus*." *Mol Microbiol* **64**(3): 795-806.
