# Supplementary material for: Archaeal TFEα/β is a hybrid of TFIIE and the RNA polymerase III subcomplex hRPC62/39
Source: eLife journal article supplement (doi:10.7554/elife.08378), 2015-06-12
Supplement: supp [file elife-08378-supp-v1.zip]

Archive with 14 entries (14 files):
- elife_poa_e08378_Figure_2_source_data_1.pdf
- elife_poa_e08378_Figure_1_figure_supplement_1.tif
- elife_poa_e08378_Supplementary_File_3.pdf
- elife_poa_e08378_Supplementary_File_4.pdf
- elife_poa_e08378_Table_1_source_data_1.pdf
- elife_poa_e08378_Figure_3_figure_supplement_1.tif
- elife_poa_e08378_Figure_6_figure_supplement_1.jpg
- elife_poa_e08378_Figure_7_figure_supplement_1.tif
- elife_poa_e08378_Supplementary_File_2.pdf
- elife_poa_e08378_Figure_2_figure_supplement_2.tif
- elife_poa_e08378_Figure_1_figure_supplement_2.tif
- elife_poa_e08378_Supplementary_File_1.pdf
- elife_poa_e08378_Figure_2_figure_supplement_1.tif
- elife_poa_e08378_Figure_7_figure_supplement_2.tif
