# Supplementary material for: Archaeal TFEα/β is a hybrid of TFIIE and the RNA polymerase III subcomplex hRPC62/39
Source: eLife journal article supplement (doi:10.7554/elife.08378), 2015-06-12
Supplement: supp [file elife-08378-supp-v1.zip › elife_poa_e08378_Figure_2_source_data_1.pdf]

**Figure 2 – Source data 1 – theoretical and experimentally calculated masses of proteins and protein complexes.**

|                  | <b>Protein</b>                             | <b>Theoretical Mass</b> | <b>Experimental Mass</b> | <b>Mass Error</b> | <b>Mass Difference (Da)</b> | <b>Mass Difference (%)</b> |
|------------------|--------------------------------------------|-------------------------|--------------------------|-------------------|-----------------------------|----------------------------|
| <b>Native MS</b> | TFE $\alpha$ + Zn                          | 21236.5                 | 21236.6                  | 4.4               | 0.2                         | 0.001                      |
|                  | TFE $\alpha$ + Zn + TFE $\beta$ + [4Fe-4S] | 36523.5                 | 36530.8                  | 11.9              | 7.3                         | 0.020                      |
|                  | hRPC62                                     | 62489.6                 | 62516.3                  | 11.8              | 26.7                        | 0.043                      |
|                  | hRPC39                                     | 35552.8                 | 35555.7                  | 13.6              | 2.9                         | 0.008                      |
|                  | hRPC62/39 + [4Fe-4S]                       | 98392.0                 | 98455.5                  | 3.6               | 63.5                        | 0.064                      |
| <b>Tandem MS</b> | hRPC39                                     | 35552.8                 | 35555.8                  | 0.6               | 3.0                         | 0.008                      |
|                  | hRPC39 + [4Fe-4S]                          | 35902.4                 | 35905.7                  | 0.2               | 3.3                         | 0.009                      |
