# Supplementary material for: Archaeal TFEα/β is a hybrid of TFIIE and the RNA polymerase III subcomplex hRPC62/39
Source: eLife journal article supplement (doi:10.7554/elife.08378), 2015-06-12
Supplement: supp [file elife-08378-supp-v1.zip › elife_poa_e08378_Supplementary_File_1.pdf]

**Supplementary file 1 – List of plasmids generated by restriction enzyme-based cloning**

| Plasmid ID | Backbone                            | Insert(s)                                                                                   | Restriction sites                     | Oligonucleotide pairs used for amplification |
|------------|-------------------------------------|---------------------------------------------------------------------------------------------|---------------------------------------|----------------------------------------------|
| p988       | pET21a+<br>(Novagen)                | Sso TFE $\alpha$                                                                            | NdeI/EcoRI                            | FW239/FW240                                  |
| p1051      | pSVA1481 (S.V. Albers, unpublished) | Sso TFE $\beta$ C-His <sub>10</sub>                                                         | BamHI/NcoI                            | FW280/FW281                                  |
| p1056      | pMJ0503<br>(Jonuscheit et al, 2003) | Sso TFE $\beta$ C-His <sub>10</sub>                                                         | AvrII/EagI                            | subcloning from p1051                        |
| p1058      | pSVA406 (Wagner et al, 2012)        | Overlap extension PCR product fusing the upstream and downstream flanks of <i>Saci_1342</i> | NcoI/BamHI                            | FW282/FW283 and FW284/FW285                  |
| p1071      | pET21a+<br>(Novagen)                | Sso TFE $\alpha$ $\Delta$ 111-178                                                           | NdeI/EcoRI                            | FW239/FW333                                  |
| p1076      | pET21a+<br>(Novagen)                | Sso TFE $\alpha$ and Sso tfe $\beta$ C-His <sub>6</sub>                                     | NdeI/EcoRI/XhoI                       | FW239/FW240 and FW242/FW279                  |
| p1077      | pRSF-1b<br>(Novagen)                | Sso TFE $\beta$ C-His <sub>6</sub>                                                          | NcoI/AvrII                            | FW280/FW336<br>(amplified from p1050)        |
| p1087      | pET21a+<br>(Novagen)                | Sso TFB (Sso0446) C-His <sub>6</sub>                                                        | NdeI/XhoI                             | FW337/FW338                                  |
| p1092      | pRSF-1b<br>(Novagen)/p1077          | Sso TFE $\beta$ C-His <sub>6</sub> $\Delta$ 74-125                                          | NdeI/XhoI                             | FW280/FW347                                  |
| p1094      | pRSF-1b<br>(Novagen)/p1077          | Sso TFE $\beta$ C-His <sub>6</sub> $\Delta$ 85-125                                          | NdeI/XhoI                             | FW280/FW349                                  |
| p1107      | pET21a+<br>(Novagen)                | Sso TFE $\alpha$ $\Delta$ 1-110                                                             | NdeI/EcoRI                            | FW387/FW240                                  |
| p1108      | pET21a+<br>(Novagen)                | Sso TFE $\alpha$ $\Delta$ 148-178                                                           | NdeI/EcoRI                            | FW239/FW388                                  |
| p1110      | pRSF-1b<br>(Novagen)/p1077          | Sso TFE $\beta$ C-His <sub>6</sub> $\Delta$ 1-73                                            | NcoI+ BspHI<br>(compatible ends)/XhoI | FW396/FW279                                  |
| p1111      | pRSF-1b                             | Sso TFE $\beta$ C-His <sub>6</sub> $\Delta$ 1-84                                            | NcoI+ BspHI                           | FW397/FW279                                  |

|         |                                  |                                                                                                                                                                                       |                                    |                                                              |
|---------|----------------------------------|---------------------------------------------------------------------------------------------------------------------------------------------------------------------------------------|------------------------------------|--------------------------------------------------------------|
|         | (Novagen)/p1077                  |                                                                                                                                                                                       | (compatible ends)/XhoI             |                                                              |
| p1112   | pSVA406 (Wagner et al, 2012)     | Overlap extension PCR product fusing the upstream and downstream flanks of <i>SacI_1162</i> to the <i>SacI_1342</i> including 100 nt upstream of its predicted translation start site | PstI/BamHI                         | FW326/FW327, FW328/FW329 and FW330/FW331                     |
| p1121   | pET21a+ (Novagen)                | Sso TBP                                                                                                                                                                               | NdeI/XhoI                          | FW449/340                                                    |
| p1159   | pET21a+ (Novagen)                | N-His <sub>6</sub> hRPC62 and hRPC39                                                                                                                                                  | NdeI/EcoRI/XhoI                    | FW569/FW570 and FW566/FW567                                  |
| p1172   | pRSF-1b (Novagen)/p1077          | recombinant RNAP clamp fusion of Rpo2 1055-1117, Rpo1' 4-315, and Rpo1" 340-377 C-His <sub>6</sub>                                                                                    | NcoI+ BspHI (compatible ends)/XhoI | FW673/FW436/FW437 /FW438/FW439/FW440 (Overlap extension PCR) |
| pSVA143 | pMZ1 (Zolghadr et al, 2007)      | Sso Rpo8 C-His <sub>10</sub> (Sso0277)                                                                                                                                                | NcoI/BamHI                         | 509/510                                                      |
| pSVA158 | pMJ0503 (Jonuscheit et al, 2003) | Sso Rpo8 C-His <sub>10</sub> (Sso0277)                                                                                                                                                | BglI/EagI                          | subcloning from pSVA143                                      |
