# Supplementary material for: Archaeal TFEα/β is a hybrid of TFIIE and the RNA polymerase III subcomplex hRPC62/39
Source: eLife journal article supplement (doi:10.7554/elife.08378), 2015-06-12
Supplement: supp [file elife-08378-supp-v1.zip › elife_poa_e08378_Supplementary_File_2.pdf]

**Supplementary file 2 – List of plasmids generated by PCR-based Site-directed mutagenesis**

| Plasmid ID | Template | Mutation                                | Oligonucleotides |
|------------|----------|-----------------------------------------|------------------|
| p1072      | p988     | Sso TFE $\alpha$ K46E                   | FW322/FW323      |
| p1073      | p988     | Sso TFE $\alpha$ R51E/K52E              | FW324/FW325      |
| p1074      | p988     | Sso TFE $\alpha$ D49T                   | FW334/FW335      |
| p1090      | p988     | Sso TFE $\alpha$ $\Delta$ 46-52         | FW345/FW346      |
| p1118      | p1077    | Sso TFE $\beta$ C-His $_6$ C112S        | FW443/FW444      |
| p1120      | p1077    | Sso TFE $\beta$ C-His $_6$ C101S        | FW447/FW448      |
| p1173      | p1077    | Sso TFE $\beta$ C-His $_6$ K64E         | FW669/FW670      |
| p1174      | p1077    | Sso TFE $\beta$ C-His $_6$<br>K56E/K57E | FW671/FW672      |
| p1175      | p988     | Sso TFE $\alpha$ C117S                  | FW667/FW668      |
| p1181      | p988     | Sso TFE $\alpha$ $\Delta$ 114-147       | FW665/FW666      |
| p1200      | p1077    | Sso TFE $\beta$ C-His $_6$ C92S         | FW733/FW734      |
| p1201      | p1077    | Sso TFE $\beta$ C-His $_6$ C95S         | FW735/FW736      |
