# Supplementary material for: Archaeal TFEα/β is a hybrid of TFIIE and the RNA polymerase III subcomplex hRPC62/39
Source: eLife journal article supplement (doi:10.7554/elife.08378), 2015-06-12
Supplement: supp [file elife-08378-supp-v1.zip › elife_poa_e08378_Supplementary_File_3.pdf]

### Supplementary file 3 – List of oligonucleotides used in this study\*

| Primer ID | Name                                              | Sequence                                                |
|-----------|---------------------------------------------------|---------------------------------------------------------|
| FW239     | Sso TFE $\alpha$ NdeI fw                          | GGCATATGGTTAACGCAGAGGATCTGTTTATC                        |
| FW240     | Sso TFE $\alpha$ stp EcoRI rv                     | GGGAATTCTCAATGATTTTTATTAGCTCCAAG                        |
| FW242     | Sso TFE $\beta$ RBS EcoRI fw                      | GGGAATTCAGGAGGTAATTAAATATGGAATCAGATTCAACAAGTAATTATGAAGC |
| FW279     | Sso TFE $\beta$ XhoI rv                           | GGCTCGAGAGATAAAGCTTTTCTATGATCCAGC                       |
| FW280     | Sso TFE $\beta$ NcoI fw                           | CCCCCATGGAATCAGATTCAACAAGTAATT                          |
| FW281     | Sso TFE $\beta$ BamHI rv                          | GGCGGATCCAGATAAAGCTTTTCTATGATCCAGC                      |
| FW282     | <i>Saci_1342</i> upstream flank<br>NcoI fw        | CCATGGAAGAACAGGTTCTCTCTAACAGC                           |
| FW283     | <i>Saci_1342</i> upstream flank rv                | CACTAGTTAAGATATTTTCCCATTATTACTTTATTTC                   |
| FW284     | <i>Saci_1342</i> downstream flank<br>fw           | AAATAAATGGGGAAATATCTTAAGTAGTGTTCGCTGGATAAC              |
| FW285     | <i>Saci_1342</i> downstream flank<br>BamHI rv     | GGATCCACGTTGCTATAACTGCTACAGATCTT                        |
| FW322     | Sso TFE $\alpha$ K46E fw                          | CAGTTGAATATAGAAGTTAATGATGTAAGGAAG                       |
| FW323     | Sso TFE $\alpha$ K46E rv                          | CTTACATCATTAAGTTCTATATTCAACTGATTCGC                     |
| FW324     | Sso TFE $\alpha$ R51E/K52E fw                     | GTTAATGATGTAGAGGAGAAATTAATTTACTAGAGGAG                  |
| FW325     | Sso TFE $\alpha$ R51E/K52E rv                     | GTAAATTTAATTTCTCTCTACATCATTAAGTTTATATCAAC               |
| FW326     | <i>Saci_1162</i> upstream flank<br>PstI fw        | GGCCGGCTGCAGATATTATGACATTTGTTCAGGAGC                    |
| FW327     | <i>Saci_1162</i> upstream flank rv                | ATGCTCAAAGTATAGGACTACTTTCATAAATAAAATAGATATTCAA          |
| FW328     | <i>Saci_1342</i> promoter fw                      | GAAAGTAGTCTTATAGTTTGAGCATAACAGAAGTAACAATAAG             |
| FW329     | <i>Saci_1342</i> rv                               | TAAATTATGCTATCCAGCAGAAACACTAGTTAAGATAT                  |
| FW330     | <i>Saci_1162</i> downstream flank<br>fw           | TCTGCTGGATAGCATAATTATAACTAAAAATATAAGGTAAAAA             |
| FW331     | <i>Saci_1162</i> downstream flank<br>BamHI rv     | GCGCGCGGATCCGATGTGGATGACAAAGAGCACT                      |
| FW333     | Sso TFE $\alpha$ $\Delta$ 111-178 stp<br>EcoRI rv | GCGGGAATTCTCATTTCTCATATTCCAATCTTGTC                     |
| FW334     | Sso TFE $\alpha$ D49T fw                          | GAATATAAAAGTTAATACGGTAAGGAAGAAATTAATTTACT               |
| FW335     | Sso TFE $\alpha$ D49T rv                          | TAATTTCTTCTTACCGTATTAACTTTATATTCAACTGAT                 |
| FW336     | pET21a+ AvrII rv                                  | GGCGCCTAGGCAGCTTCTTTTCGGGCTT                            |
| FW337     | Sso TFB NdeI fw                                   | GGCGCATATGTTGTATTTGTCTGAAGAAAATAAATCC                   |

|       |                                                   |                                                                                 |
|-------|---------------------------------------------------|---------------------------------------------------------------------------------|
| FW338 | Sso TFB XhoI rv                                   | GCGGCTCGAGTTGAGTAGGTATTGATATTTTCTAGCTCTTG                                       |
| FW340 | Sso TBP stp XhoI rv                               | GCGGCTCGAGTTAGAGCTCTAACTCTTCCTCTTCCTC                                           |
| FW345 | Sso TFE $\alpha$ $\Delta$ 46-52 fw                | GGCGGTGGCGGTAAATTAAATTTACTAGAGGAGCAAGGT                                         |
| FW346 | Sso TFE $\alpha$ $\Delta$ 46-52 rv                | TATATTCAACTGATTCGCTATTTCTTC                                                     |
| FW347 | Sso TFE $\beta$ $\Delta$ 74-125 XhoI rv           | GCGGCTCGAGATCAACAGCAAATAGTTTACTATATTTTT                                         |
| FW349 | Sso TFE $\beta$ $\Delta$ 85-125 XhoI rv           | GCGGCTCGAGAAGATTTATATAAATGTTTATATTATAATTATTATCAACA                              |
| FW387 | Sso TFE $\alpha$ $\Delta$ 1-110 NdeI fw           | GGCGCATATGAATAATACGTTCTTTATATGCCCTCAA                                           |
| FW388 | Sso TFE $\alpha$ $\Delta$ 148-178 stp<br>EcoRI rv | GCGGGAATTCTCAATCATAATAGGTTAGTTGCGATCCA                                          |
| FW391 | Sso TFE $\beta$ $\Delta$ 115-125XhoIrv            | GCGGCTCGAGTTTACTGCAAGTTTGTGGACTTACA                                             |
| FW396 | Sso TFE $\beta$ $\Delta$ 1-73 BspHI fw            | GGCGTCATGAATAATTATAATATAAACATTTATATAAATCTTAATGGTT                               |
| FW397 | Sso TFE $\beta$ $\Delta$ 1-84 BspHI fw            | GGCGTCATGAATGGTTTAGATGAAATTCCTTGC                                               |
| FW436 | Sso Rpo2 1055-1117 rv                             | TCCTTTTATATTCTTACCGCCATCCTCCAAAACCTAACCTAGGTGAG                                 |
| FW437 | Sso Rpo1' 4-315 fw                                | TTAGTTTTGGAGGATGGCGGTAAGAATATAAAAGGAATAAAGTTTGAAT                               |
| FW438 | Sso Rpo1' 4-315 rv                                | ACCCGCGCGCTGCCGCGCCACCAGATAAATTACCTCTAAATCTACCTTC                               |
| FW439 | Sso Rpo1" 340-377 fw                              | GGCGCGGGCAGCGGCGGGTAGCGGTAGTGTATTAG CAAGAGCT                                    |
| FW440 | Sso Rpo1" 340-377 XhoI rv                         | GCCGCTCGAGATGACCAATTATAATGTTTCTACTACACCT                                        |
| FW443 | Sso TFE $\beta$ C112S fw                          | GTAAGTCCACAACTTCCAGTAAATTATCCGGCTGGAT                                           |
| FW444 | Sso TFE $\beta$ C112S rv                          | GCCGGATAATTTACTGGAAGTTTGTGGACTTACATGTAT                                         |
| FW447 | Sso TFE $\beta$ C101S fw                          | GTAAAGCTTAACCAAATCTGGAAATGGAATACATGTAAG                                         |
| FW448 | Sso TFE $\beta$ C101S rv                          | GTATTCATTTCCAGATTTGGTTAAGCTTTTACAACCT                                           |
| FW449 | Sso TBP NdeI fw                                   | GGCGCATATGTCCAATTCAGCGGTATCGTAT                                                 |
| FW566 | hC39 RBS EcoRI fw                                 | GGCGAATTCAGGAGGTAATTAAATATGGCAGAAGTAAAAGTAAAAGT                                 |
| FW567 | hC39 stp XhoI rv                                  | GCGCTCGAGTTAAATTCAGCCATTCGG                                                     |
| FW569 | hC62 N-His NdeI fw                                | GCGCATATGGCACACCATCACAC                                                         |
| FW570 | hC62 stp EcoRI rev                                | GGCGAATTCCTTATTGGCGTTTCATCGTACA                                                 |
| FW642 | Promoter SSV1 T6 C-less fw                        | GATTGATAGAGTAAAGTTTAAATACTTATATAGATAGAGTATAGATAGAGGGTATG<br>GAAGGAGAAATAAATTGAG |
| FW643 | C-less cassette rv                                | TCATTCACTCTCATCCCTCTT                                                           |
| FW665 | Sso TFE $\alpha$ $\Delta$ 114-147 fw              | GGCGGTGGCGGTACGGATAAAATTAAGTCCTTCTT                                             |
| FW666 | Sso TFE $\alpha$ $\Delta$ 114-147 rv              | CGTATTATTTTCTCATATTCCAA                                                         |
| FW667 | Sso TFE $\alpha$ C117S fw                         | AATACGTTCTTTATAAGCCCTCAAGATAATAGTAGA                                            |
| FW668 | Sso TFE $\alpha$ C117S rv                         | ATCTTGAGGGCTTATAAAGAACGTATTATTTTCTCA                                            |
| FW669 | Sso TFE $\beta$ K64E fw                           | GTTTTACTATATTTCCCCATTTTCTTCACTGC                                                |
| FW670 | Sso TFE $\beta$ K64E rv                           | GAAAGAAAATGGGGAAAATATAGTAAACATTTTGCTGT                                          |

|       |                                                 |                                                                                               |
|-------|-------------------------------------------------|-----------------------------------------------------------------------------------------------|
| FW671 | Sso TFEβ K56E/K57E fw                           | GAAGAACTAATTATTGAAGAAGCAGTGAAAGAAAATGGG                                                       |
| FW672 | Sso TFEβ K56E/K57E rv                           | CTTTCAC TGCTTCTTCAATAATTAGTTTCTCTCGACT                                                        |
| FW673 | Sso Rpo2 BspHI 1055-1117<br>fw                  | GGCCTCATGAGGACAATGATTACGTTTGTGATC                                                             |
| FW683 | <i>Saci_1342</i> upstream<br>detection fw       | GCGCATCTGTAGACGATGAA                                                                          |
| FW684 | <i>Saci_1342</i> downstream<br>detection rv     | GTGCAGCGAAATCAAAACAA                                                                          |
| FW749 | Promoter EF-1α C-less fw                        | CTTAAGTTCAAGGTAACTTTTATTAACTCTATCACTATATCGGTTAAGAGAGATG<br>GAAGGAGAATATAATTGAG                |
| FW750 | Promoter tRNA <sup>Leu</sup> C-less fw          | ATTTTGTGTGGAAAAACATATAAGGTAAACTGAACTCAGTATAATAGATTGATGG<br>AAGGAGAATATAATTGAG                 |
| FW733 | Sso TFEβ C92S fw                                | GATGAAATTCCTTCCTTAAGTTGTAAAAGCTTAACC                                                          |
| FW734 | Sso TFEβ C92S rv                                | CTTTTACAACCTTAAGGAAGGAATTCATCTAAACCA                                                          |
| FW735 | Sso TFEβ C95S rv                                | GGTTAAGCTTTTAGAACTTAAGCAAGGAATTTCA                                                            |
| FW736 | Sso TFEβ C95S fw                                | CCCTTGCTTAAGTTCTAAAAGCTTAACCAAATGTG                                                           |
| FW917 | Promoter Rpo5 C-less fw                         | AGTAAGTCAGAGTAAACTCTTATTAAACCAAATGTAGTATGTGAATAATGGTTAAT<br>AATGAGAGGATATGGAAGGAGAATATAATTGAG |
| FW918 | Promoter 16S/23S rRNA C-<br>less fw             | ATATAGAAGTTAGATTTATATGGGATTTCAGAACAATATGTATAATGGGGATTATG<br>GAAGGAGAATATAATTGAG               |
| FW925 | Promoter SSB C-less fw                          | TTCATTAACACATAGATTTATAAATGGATAAAATGATATTTGAAATAAGAAATGTG<br>AGATTGAAAGAGGGGAGGAAG             |
| FW969 | Promoter hybrid rRNA/ EF-<br>1α C-less fw       | ATATAGAAGTTAGATTTATATGGGATTTCAGAACTATATCGGTTAAGAGAGATG<br>GAAGGAGAATATAATTGAG                 |
| FW971 | Promoter rRNA/tRNA <sup>Leu</sup> C-<br>less fw | ATATAGAAGTTAGATTTATATGGGATTTCAGAACTCAGTATAATAGATTGATGG<br>AAGGAGAATATAATTGAG                  |
| 509   | Sso <i>rpoG</i> NcoI fw                         | CCCCCATGGTGGAATCAGTGGCACAAG                                                                   |
| 510   | Sso <i>rpoG</i> BamHI rv                        | CCCCCGGATCCATTGTTTTCTTCACGC                                                                   |

\*restriction sites are underlined and ribosome-binding sites are depicted in bold.
