# Supplementary material for: Archaeal TFEα/β is a hybrid of TFIIE and the RNA polymerase III subcomplex hRPC62/39
Source: eLife journal article supplement (doi:10.7554/elife.08378), 2015-06-12
Supplement: supp [file elife-08378-supp-v1.zip › elife_poa_e08378_Supplementary_File_4.pdf]

**Supplementary file 4 – List of *in vitro* transcription templates with promoters fused to C-less cassette**

| Plasmid ID | Backbone         | Promoter                        | C-less cassette | Oligonucleotide pairs used for amplification |
|------------|------------------|---------------------------------|-----------------|----------------------------------------------|
| p1176      | pGEM-T (Promega) | SSV1-T6                         | 150 nt          | FW642/FW643                                  |
| p1205      | pGEM-T (Promega) | Sso0216 (EF1                    | 150 nt          | FW749/FW643                                  |
| p1206      | pGEM-T (Promega) | SSOt30 (tRNA <sup>Leu</sup> )   | 149 nt          | FW750/FW643                                  |
| p1212      | pGEM-T (Promega) | Rpo5                            | 164 nt          | FW917/643                                    |
| p1213      | pGEM-T (Promega) | 16S/23S rRNA                    | 150 nt          | FW918/643                                    |
| p1216      | pGEM-T (Promega) | SSB                             | 109 nt          | FW925/643                                    |
| p1236      | pGEM-T (Promega) | hybrid rRNA/EF1 $\alpha$        | 150 nt          | FW969/FW643                                  |
| p1238      | pGEM-T (Promega) | hybrid rRNA/tRNA <sup>Leu</sup> | 149 nt          | FW971/FW643                                  |
