# Supplementary figures and images for: Archaeal TFEα/β is a hybrid of TFIIE and the RNA polymerase III subcomplex hRPC62/39
Source: eLife journal article supplement (doi:10.7554/elife.08378), 2015-06-12

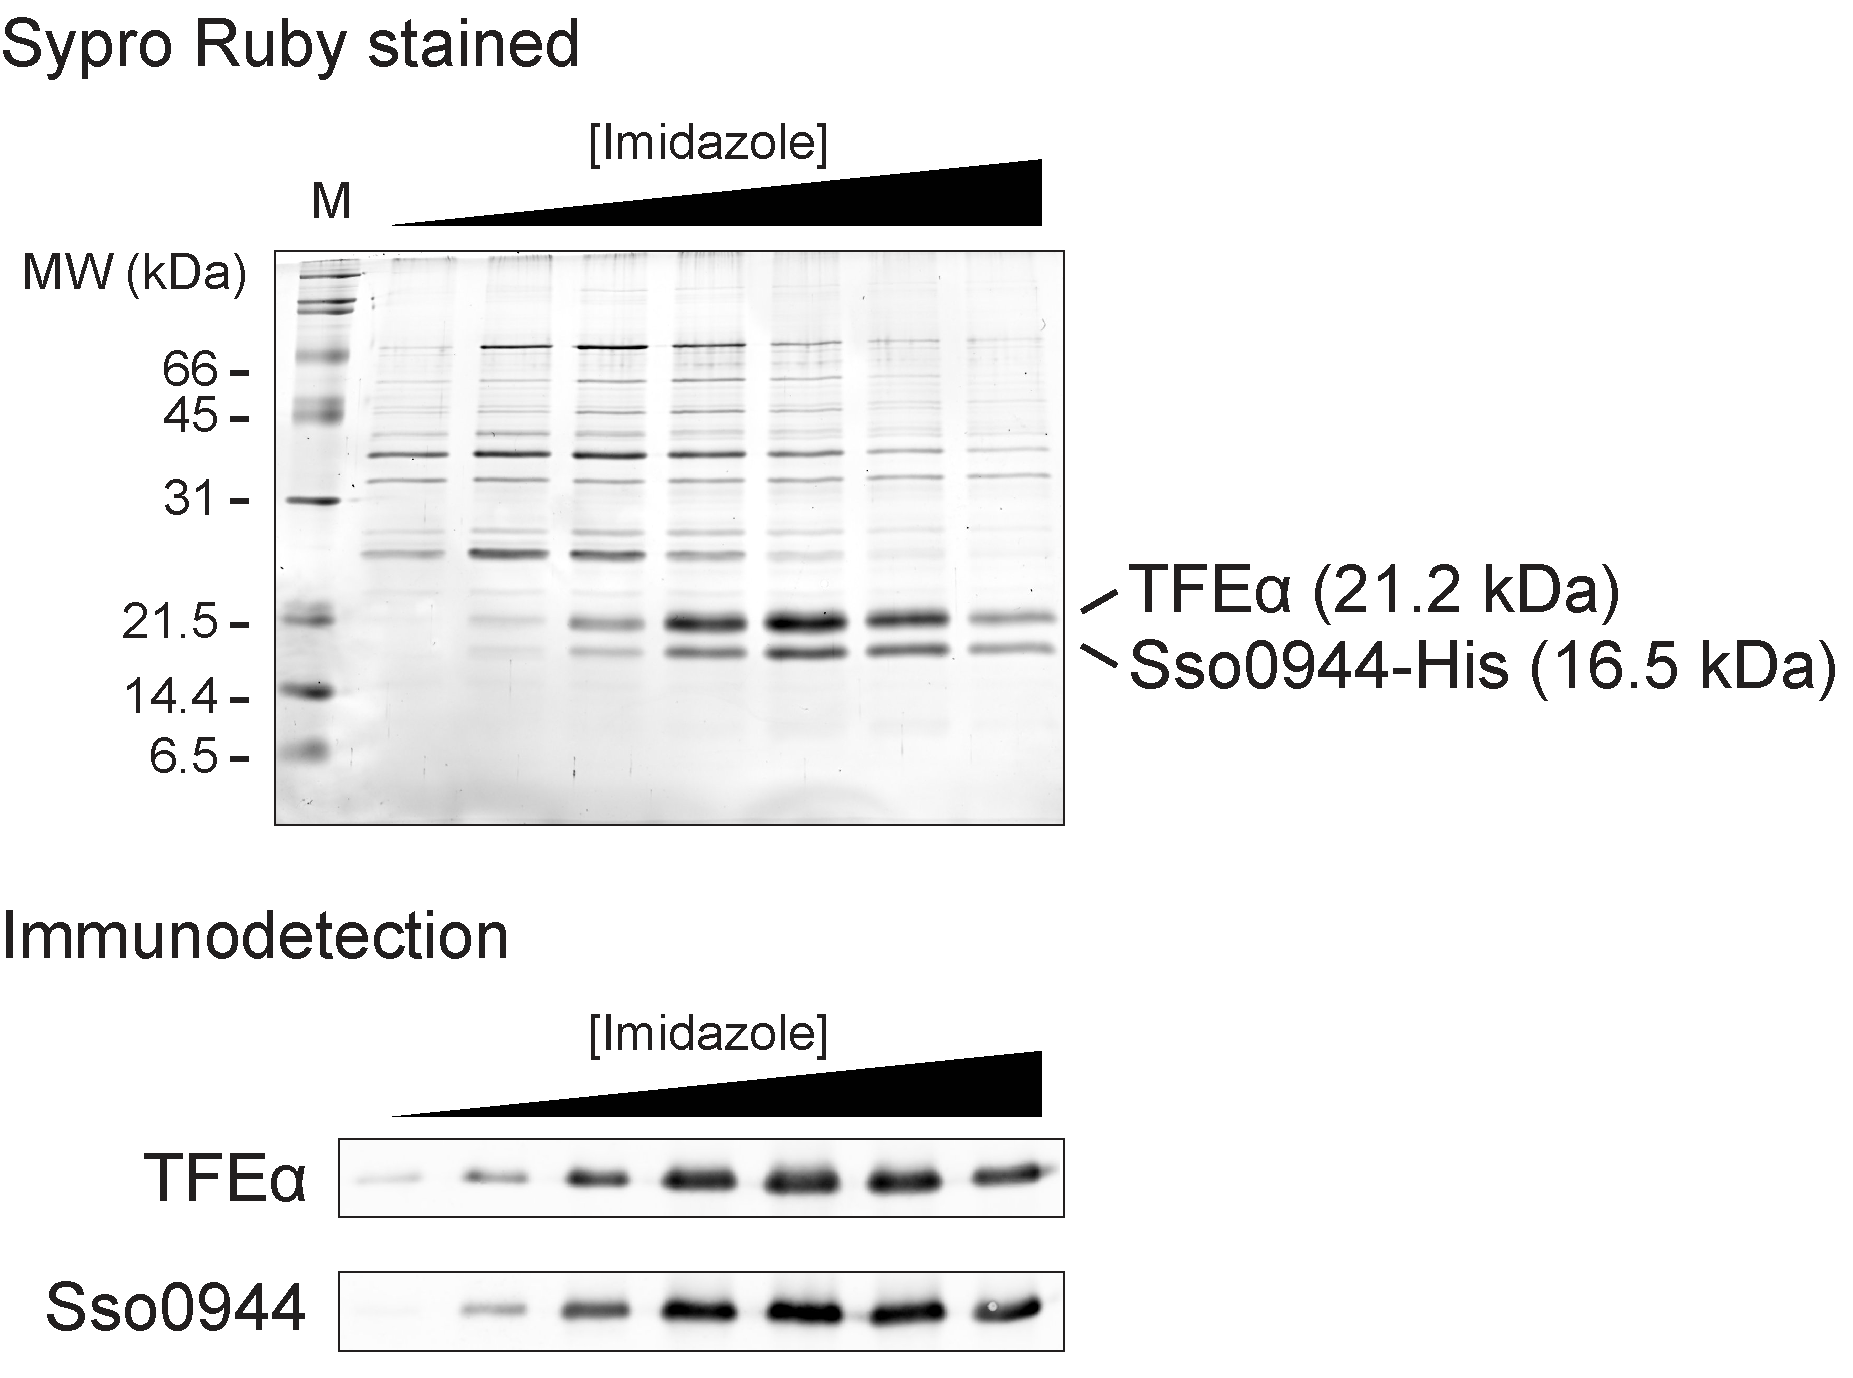

Supplement: supp [file elife-08378-supp-v1.zip › elife_poa_e08378_Figure_1_figure_supplement_1.tif]

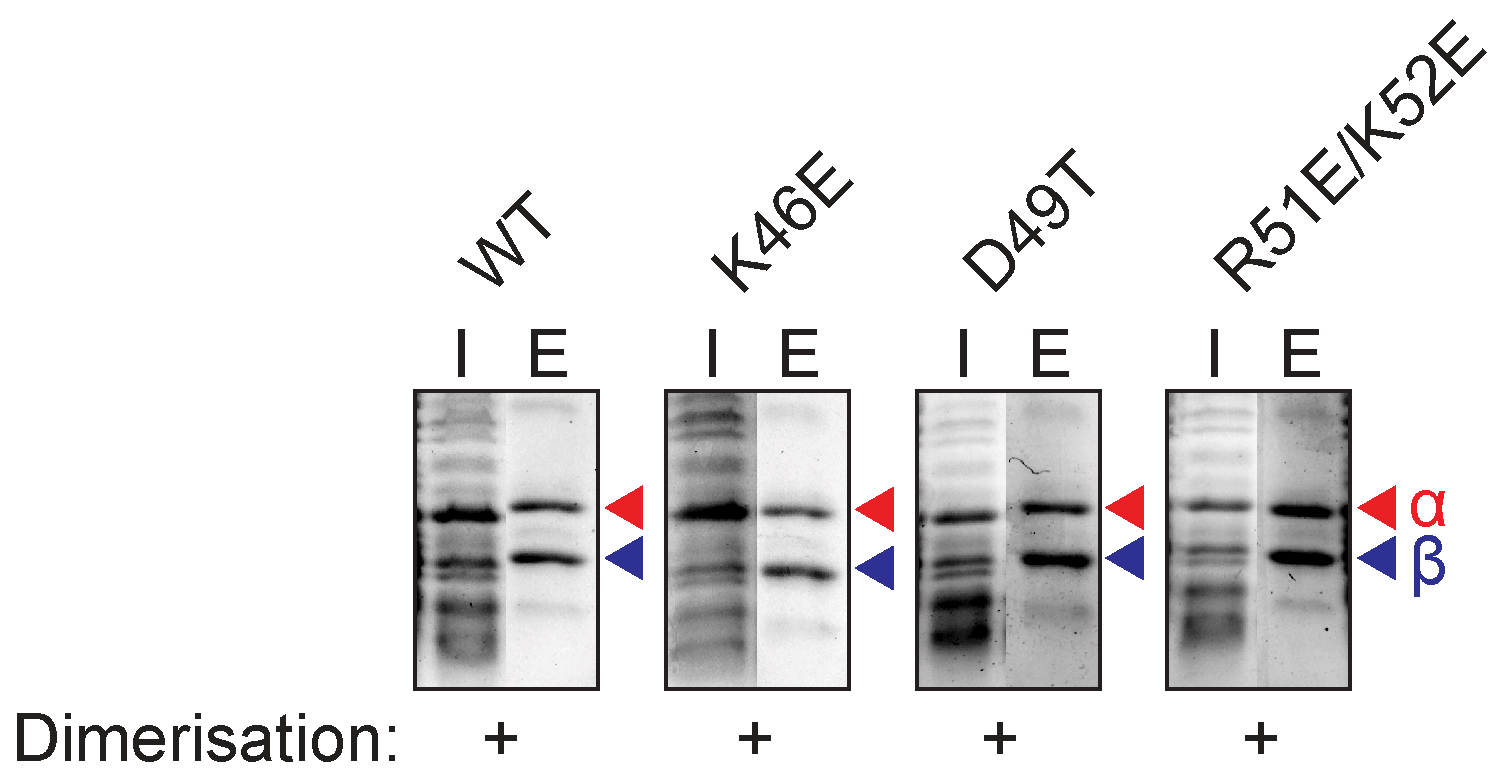

Supplement: supp [file elife-08378-supp-v1.zip › elife_poa_e08378_Figure_3_figure_supplement_1.tif]

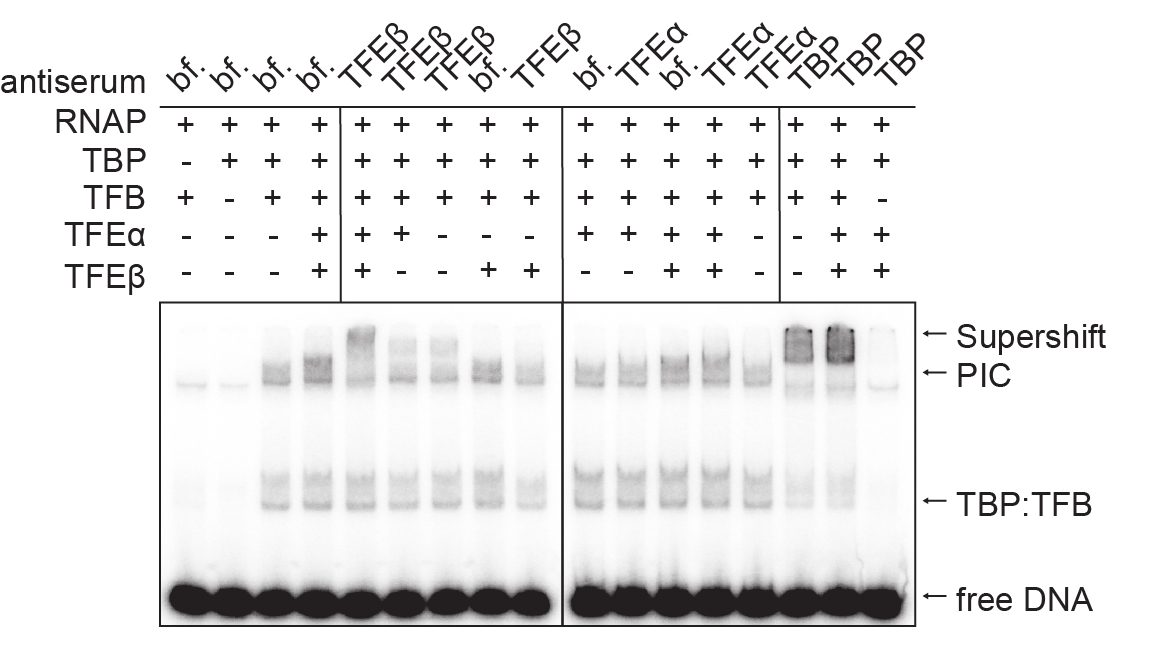

Supplement: supp [file elife-08378-supp-v1.zip › elife_poa_e08378_Figure_6_figure_supplement_1.jpg]

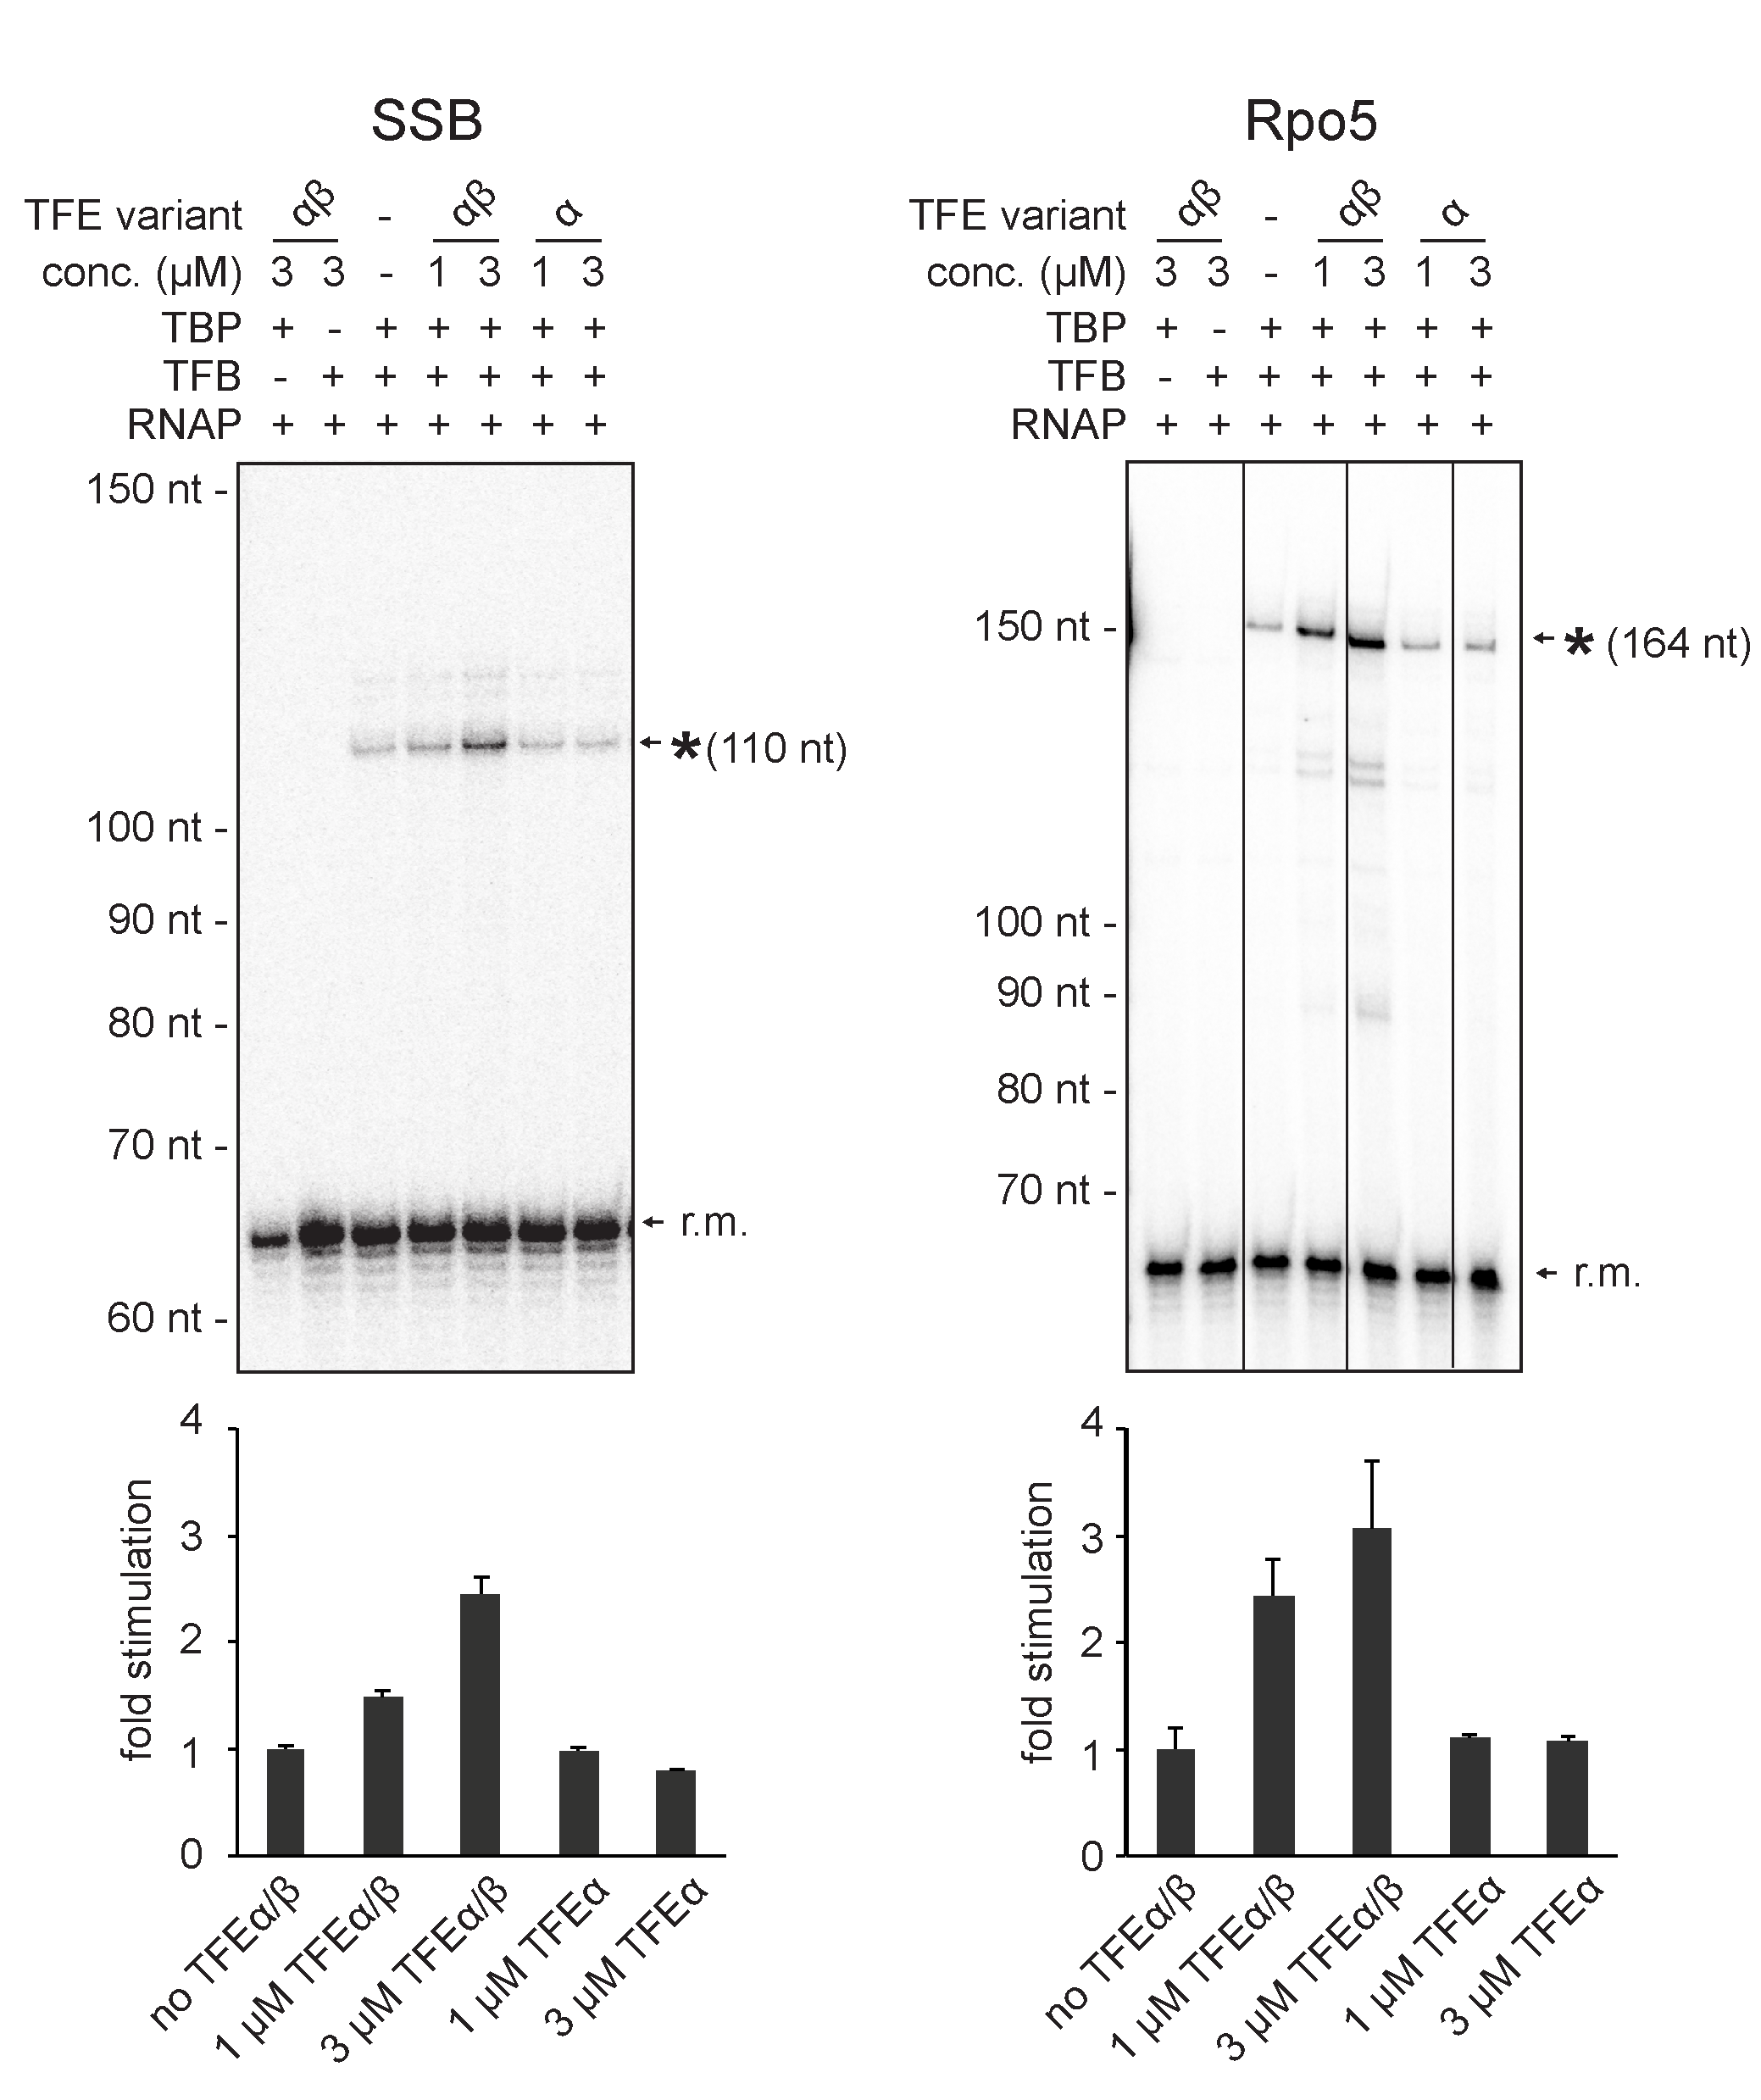

Supplement: supp [file elife-08378-supp-v1.zip › elife_poa_e08378_Figure_7_figure_supplement_1.tif]

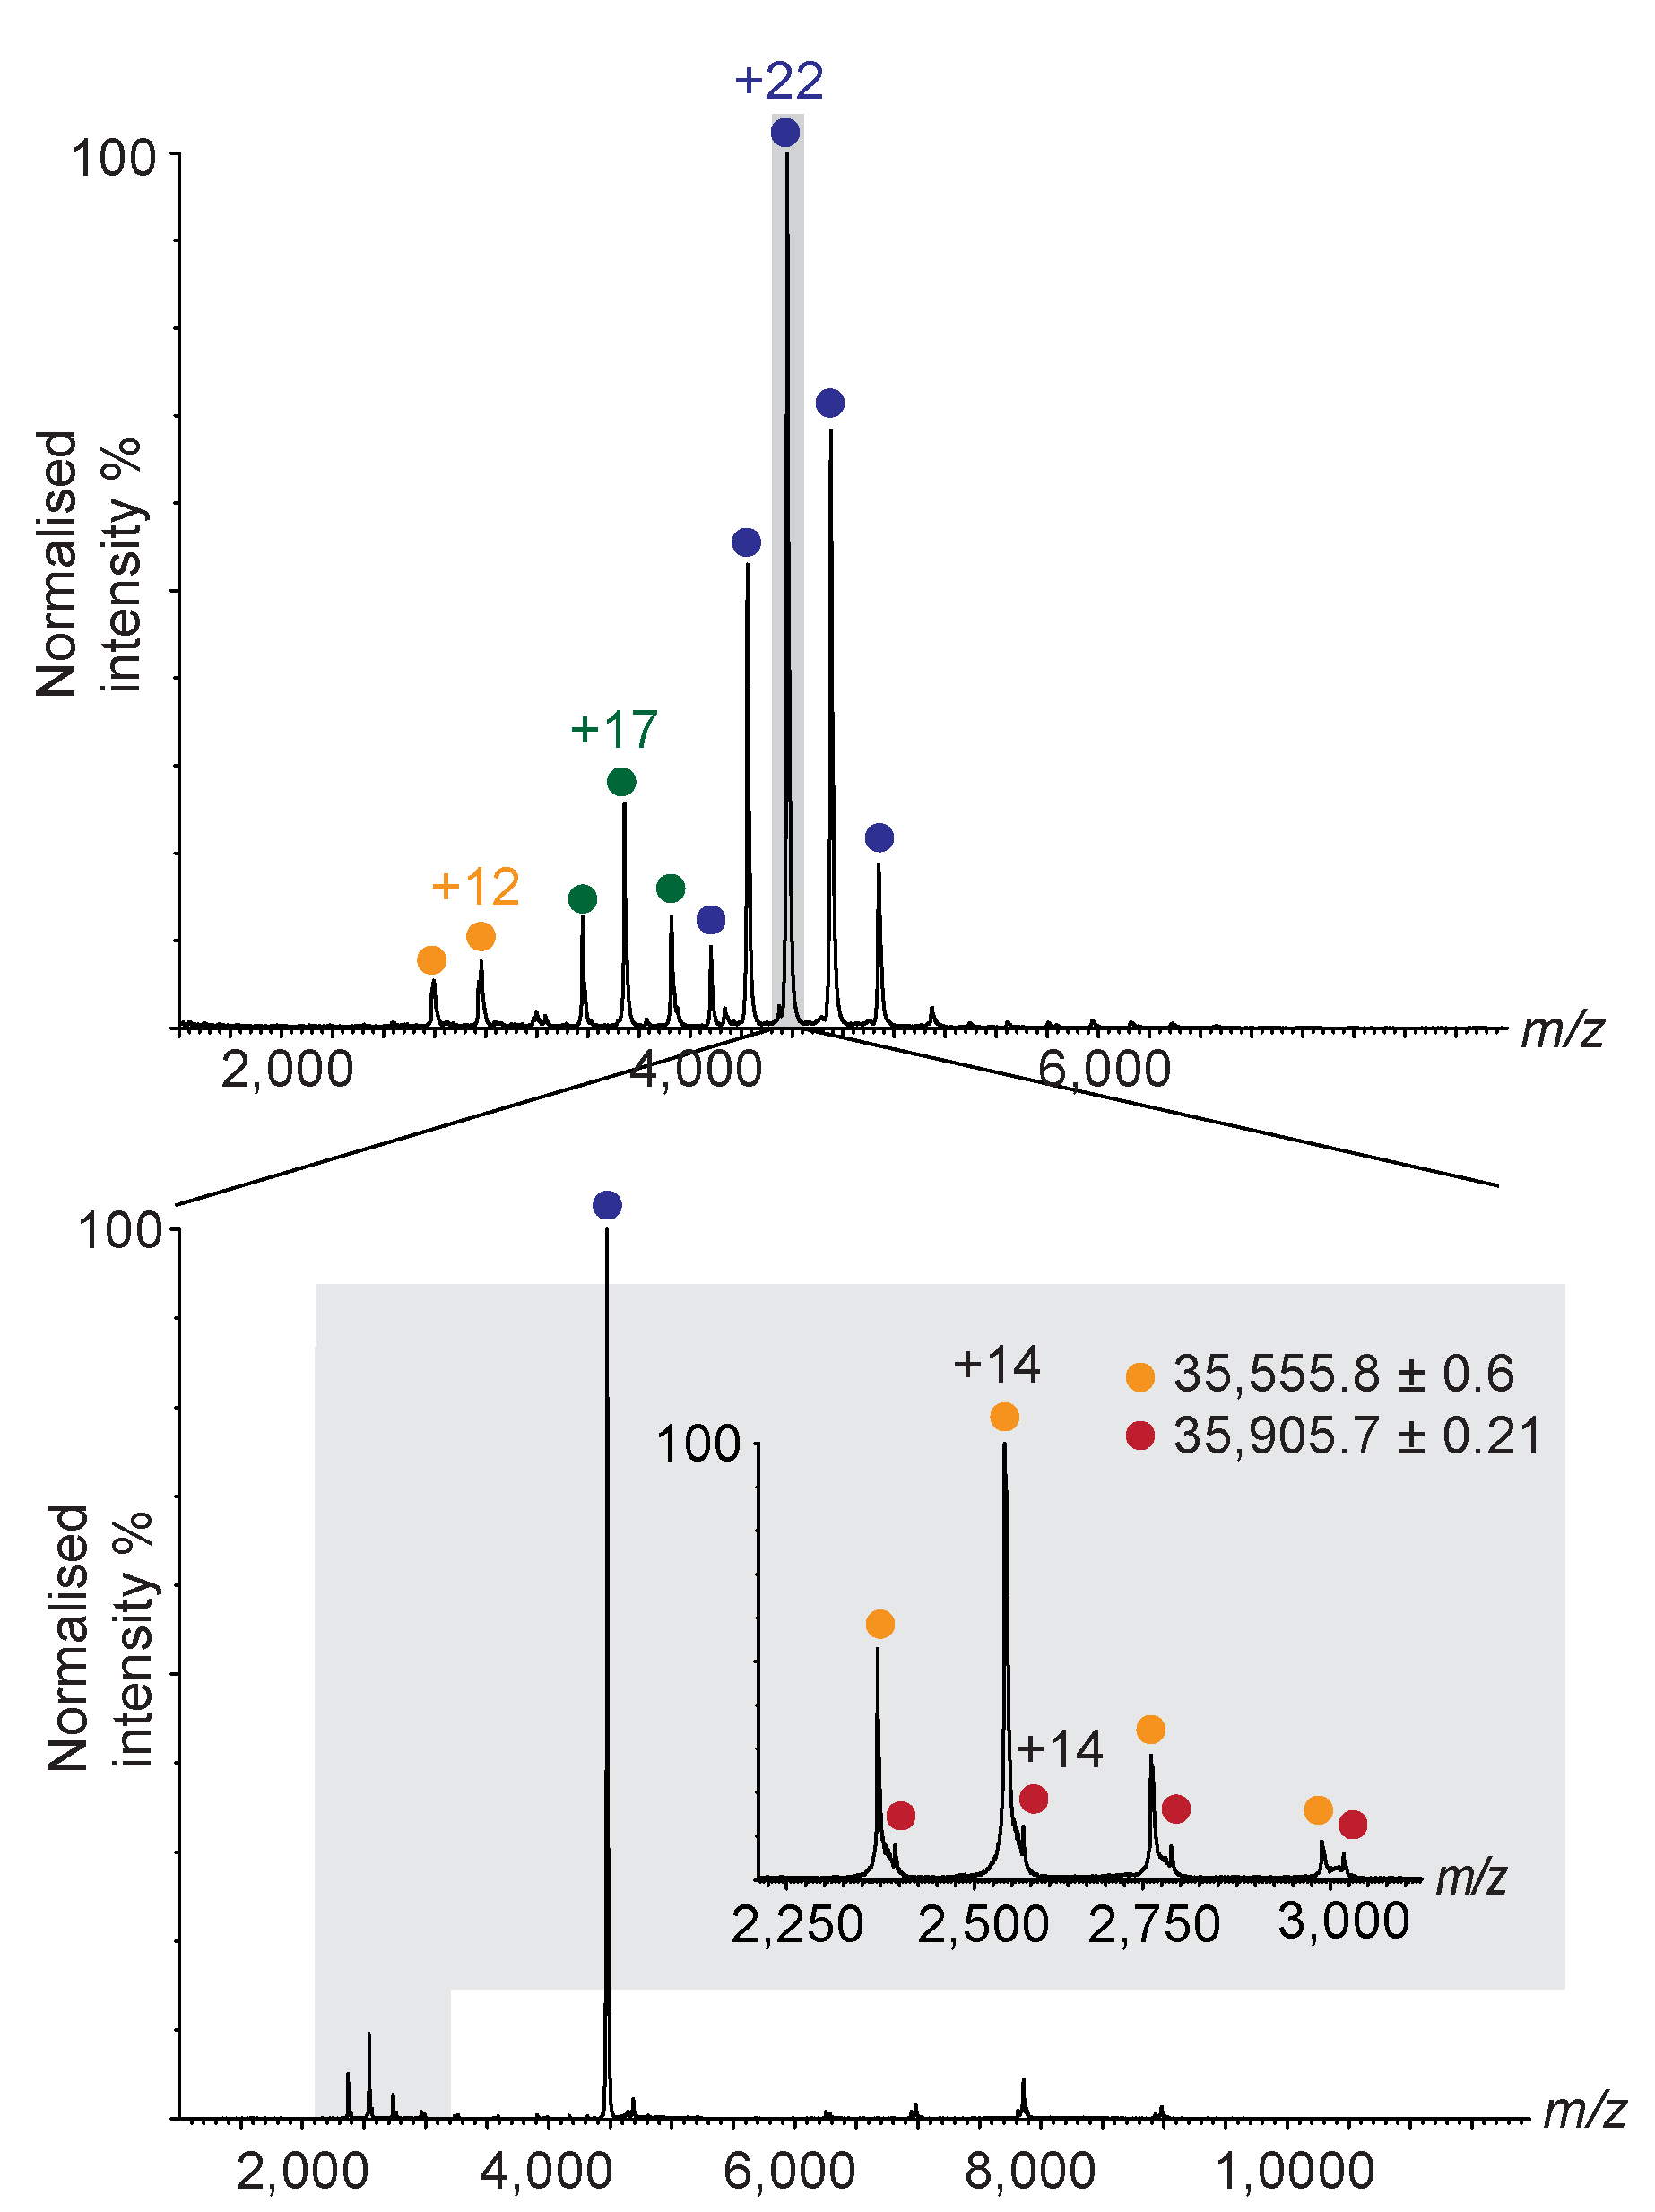

Supplement: supp [file elife-08378-supp-v1.zip › elife_poa_e08378_Figure_2_figure_supplement_2.tif]

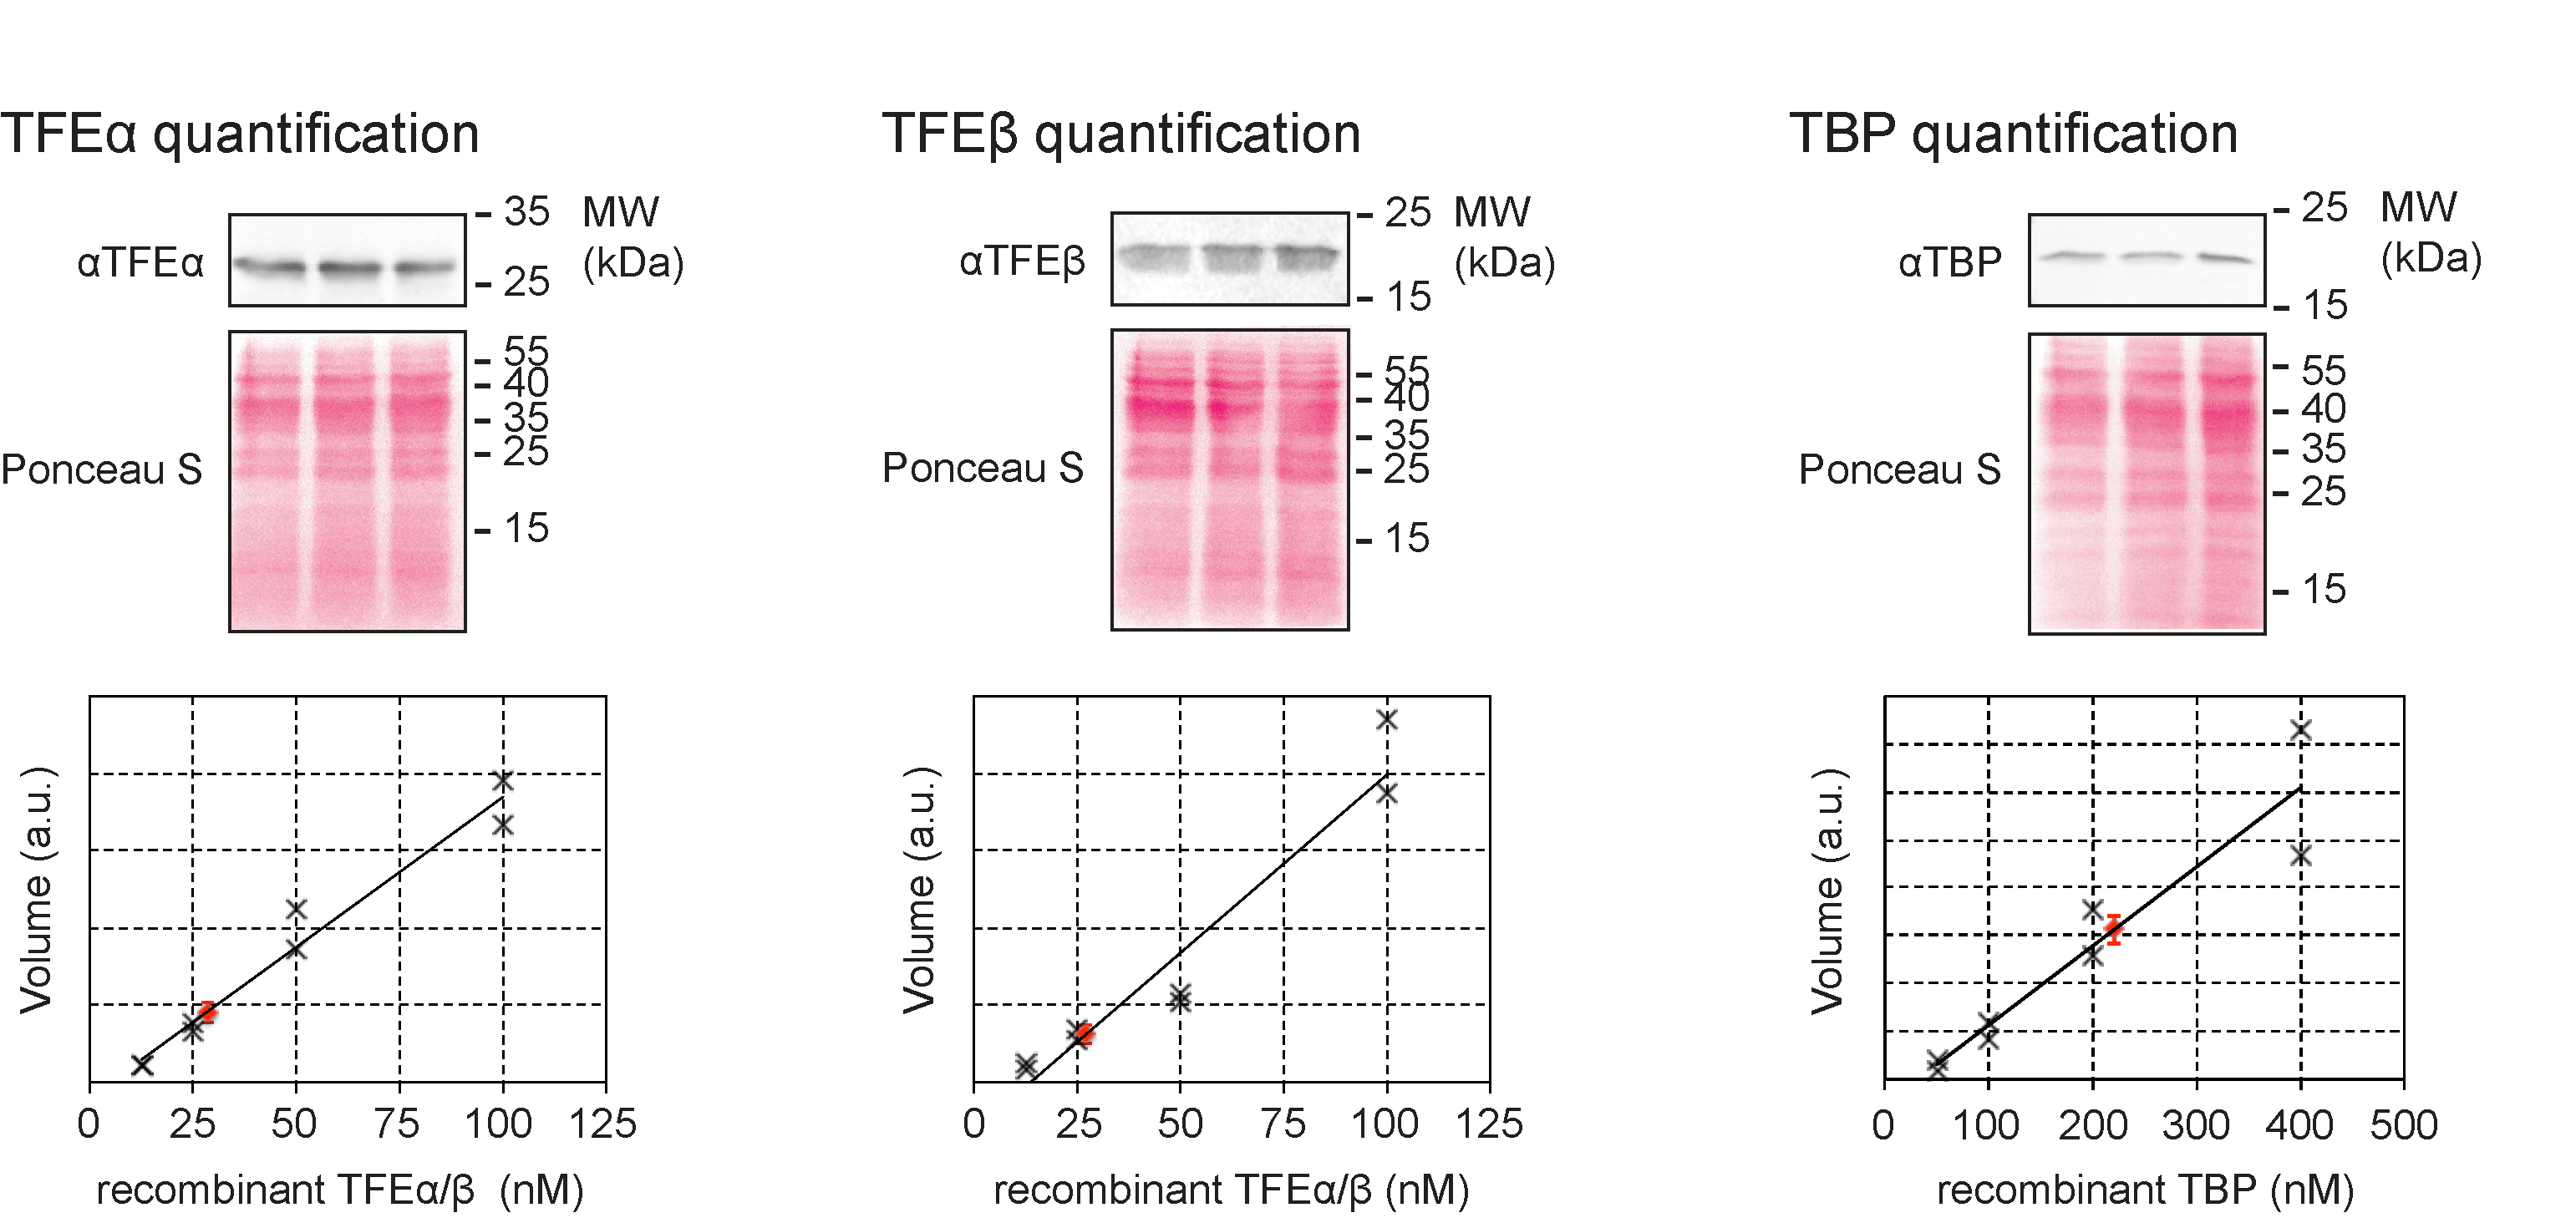

Supplement: supp [file elife-08378-supp-v1.zip › elife_poa_e08378_Figure_1_figure_supplement_2.tif]

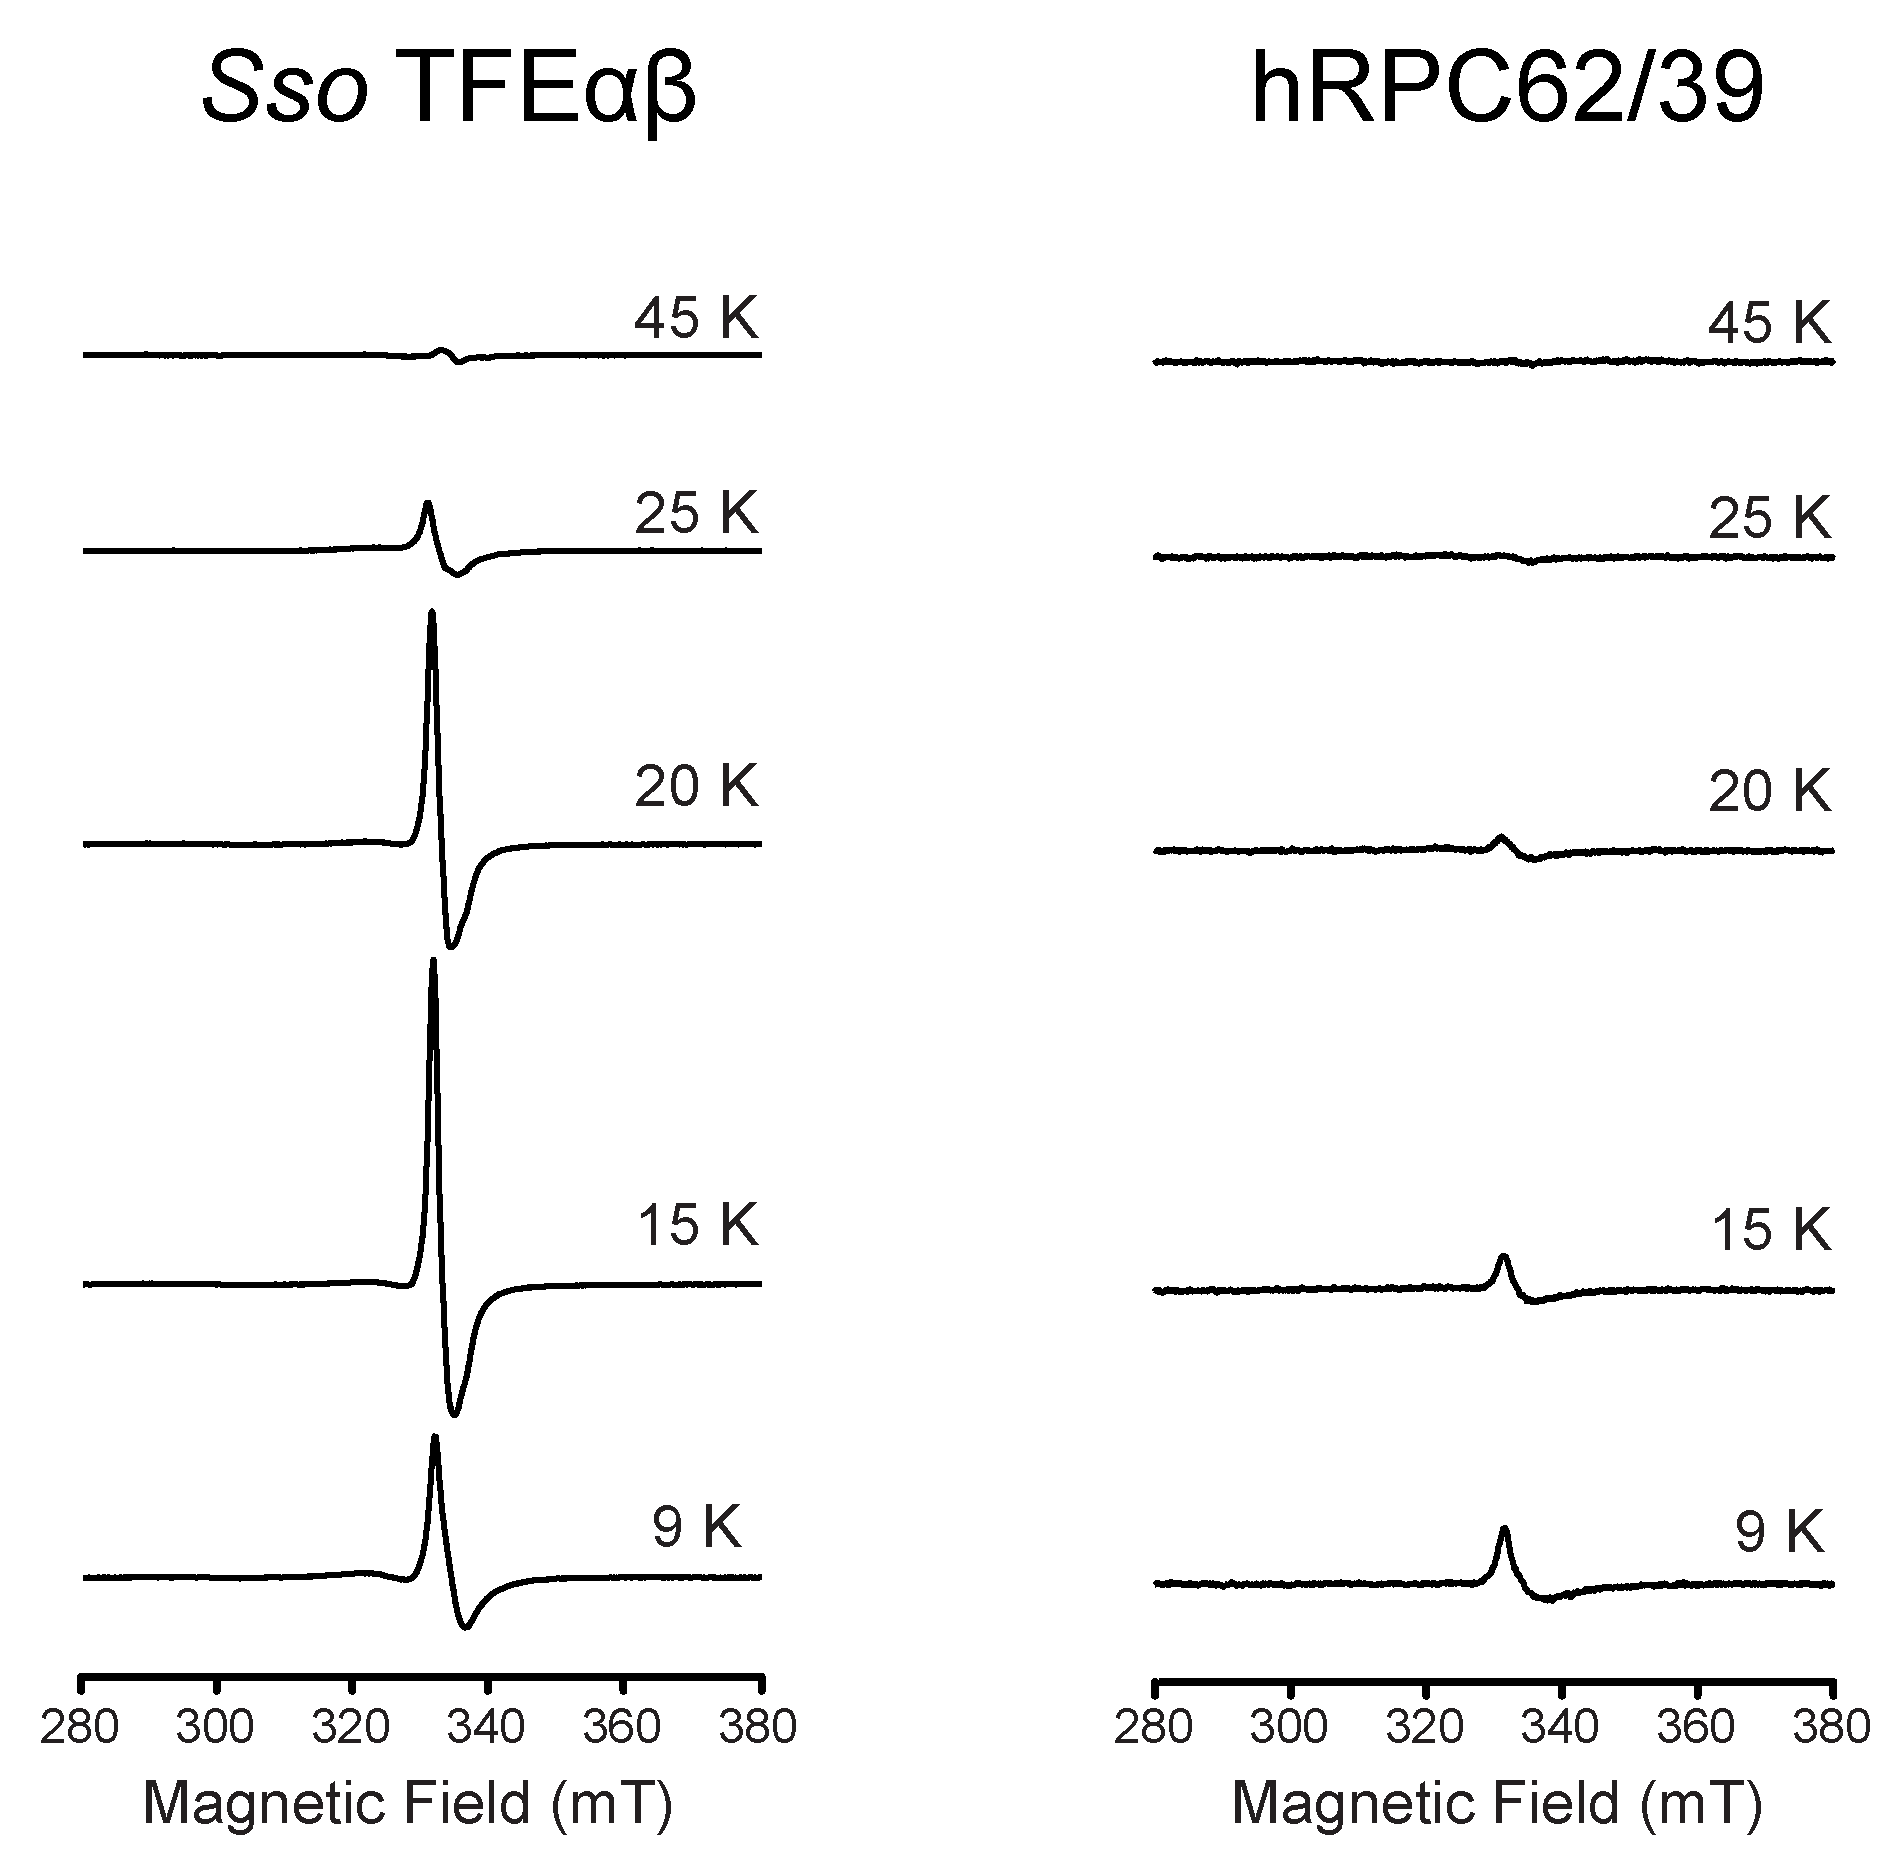

Supplement: supp [file elife-08378-supp-v1.zip › elife_poa_e08378_Figure_2_figure_supplement_1.tif]

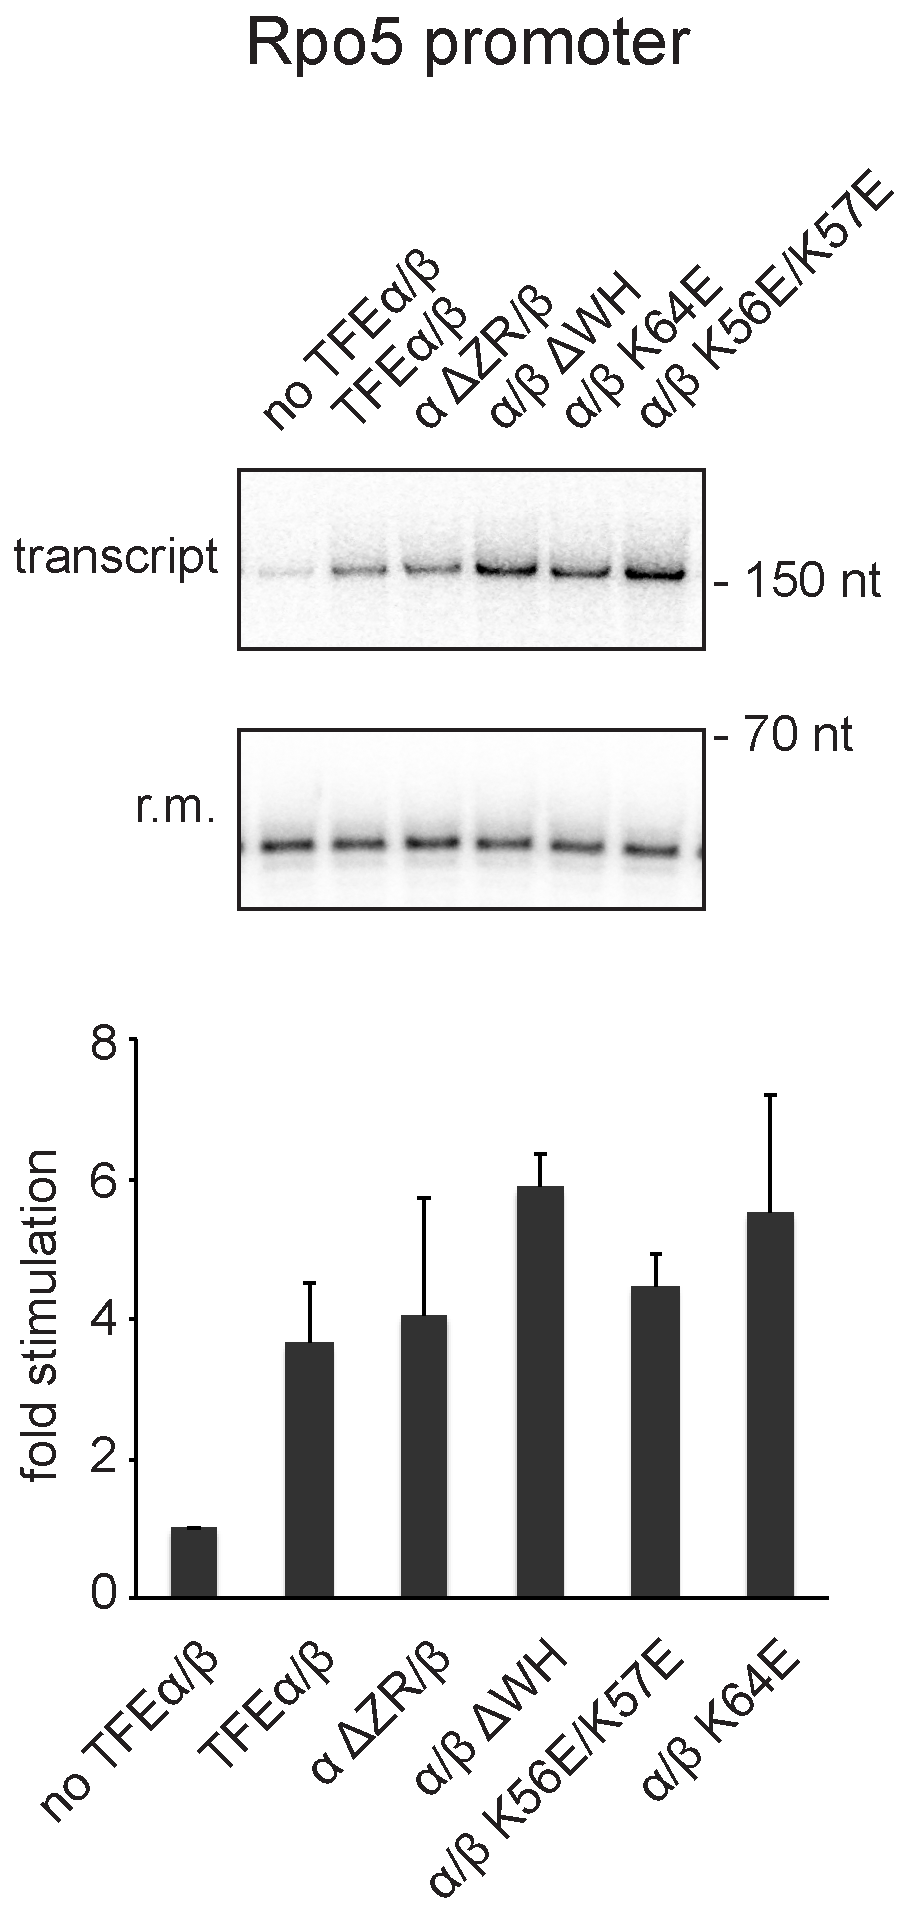

Supplement: supp [file elife-08378-supp-v1.zip › elife_poa_e08378_Figure_7_figure_supplement_2.tif]
